# Supplementary material for: Synthesis, mixed-spin-state structure and Langmuir–Blodgett deposition of amphiphilic Fe(iii) quinolylsalicylaldiminate complexes
Source: Royal Society of Chemistry journal article supplement (doi:10.1039/d4ra06111j), 2024-01-01
Supplement: d4ra06111j1.pdf [file d4ra06111j1.pdf]

# **Synthesis, mixed-spin-state structure and Langmuir-Blodgett deposition of amphiphilic Fe(III) quinolylsalicylaldimine complexes**

Peeranuch Pongsripong,<sup>b</sup> Theerapoom Boonprab,<sup>a</sup> Phimpaka Harding,<sup>a</sup>  
Keith S. Murray,<sup>c</sup> Wasinee Phonsri,<sup>c</sup> Ningjin Zhang<sup>d</sup>, Jonathan A. Kitchen<sup>e†</sup> and  
David J. Harding<sup>a†</sup>

<sup>a</sup> School of Chemistry, Institute of Science, Suranaree University of Technology,  
Nakhon Ratchasima, 30000, Thailand

Previous address: Functional Materials and Nanotechnology Centre of Excellence,  
Walailak University, Thasala, Nakhon Si Thammarat, 80160, Thailand

<sup>b</sup> Functional Materials and Nanotechnology Centre of Excellence, Walailak University,  
Thasala, Nakhon Si Thammarat, 80160, Thailand

<sup>c</sup> School of Chemistry, Monash University, Clayton, Victoria 3800, Australia

<sup>d</sup> School of Chemistry, University of Southampton, Highfield, Southampton, SO17 3SJ,  
United Kingdom

<sup>e</sup> Department of Chemistry, Auckland University of Technology, New Zealand.

<sup>f</sup> The MacDiarmid Institute for Advanced Materials and Nanotechnology, New Zealand

E-mail: david@g.sut.ac.th or jonathan.kitchen@aut.ac.nz

## Contents

|                                                                                                                                                   |           |
|---------------------------------------------------------------------------------------------------------------------------------------------------|-----------|
| <i>Synthesis of the pre-ligands and Hqsal-OR; R = C<sub>12</sub>H<sub>25</sub>, C<sub>16</sub>H<sub>33</sub> and C<sub>22</sub>H<sub>45</sub></i> | <b>1</b>  |
| <i>NMR spectra of Hqsal-OR; R = C<sub>12</sub>H<sub>25</sub>, C<sub>16</sub>H<sub>33</sub> and C<sub>22</sub>H<sub>45</sub></i>                   | <b>5</b>  |
| <i>FT-IR and UV-Visible absorption spectra of Hqsal-OR</i>                                                                                        | <b>8</b>  |
| <i>Mass spectra of Hqsal-OR and [Fe(qsal-OR)<sub>2</sub>]NO<sub>3</sub> (1-3)</i>                                                                 | <b>9</b>  |
| <i>FT-IR and UV-Visible absorption spectra of [Fe(qsal-OR)<sub>2</sub>]NO<sub>3</sub> (1-3)</i>                                                   | <b>13</b> |
| <i>Crystallographic data for Hqsal-OC<sub>12</sub>H<sub>25</sub> and 1</i>                                                                        | <b>14</b> |
| <i>Powder X-ray diffraction (PXRD) of [Fe(qsal-OR)<sub>2</sub>]NO<sub>3</sub> (1,3)</i>                                                           | <b>18</b> |
| <i>Langmuir data for Hqsal-OR and [Fe(qsal-OR)<sub>2</sub>]NO<sub>3</sub> (1,3)</i>                                                               | <b>18</b> |

## Synthesis of the pre-ligands and Hqsal-OR; R = C<sub>12</sub>H<sub>25</sub>, C<sub>16</sub>H<sub>33</sub> and C<sub>22</sub>H<sub>45</sub>

The alkoxyaldehydes were synthesized using the procedure described by Albrecht and co-workers (C. Gandolfi, C. Moitzi, P. Schurtenberger, G. G. Morgan and M. Albrecht, *J. Am. Chem. Soc.*, 2008, **130**, 14434–14435). We include details of these pre-ligands in the interests of completeness.

### **Synthesis of 4-(dodecyloxy)salicylaldehyde**

To a solution of 2,4-dihydroxybenzaldehyde (1.86 g, 13.2 mmol) in DMF (15 mL) was added NaHCO<sub>3</sub> (1.11 g, 13.2 mmol). After 10 min stirring at RT, 1-bromododecane (3.163 mL, 13.2 mmol) in THF (20 mL) was slowly added. The mixture was heated to 120 °C for overnight under Ar. After cooling to RT, aqueous HCl (1 M, 100 mL) was added, and the mixture was stirred vigorously and then filtered. Purification by column chromatography (SiO<sub>2</sub>, hexane-ethyl acetate 9:1) afforded a micro analytically pure white solid (2.71 g, 67%).  $\nu_{\max}/\text{cm}^{-1}$  3053, 2919 (alkyl chain), 2852 (alkyl chain), 1673 (C=O).

### **Synthesis of 4-(hexyloxy)salicylaldehyde**

To a solution of 2,4-dihydroxybenzaldehyde (1.86 g, 13.2 mmol) in DMF (20 mL) was added NaHCO<sub>3</sub> (1.11 g, 13.2 mmol). After 10 min stirring at RT, 1-bromohexadecane (4.0305 mL, 13.2 mmol) in THF (20 mL) was slowly added. The mixture was heated to 120 °C for overnight under Ar. After cooling to RT, aqueous HCl (1 M, 100 mL) was added until pH  $\approx$  7, and the mixture was stirred vigorously and then cooled in the fridge. The residue was suspended, filtered to give the title compound as a pale-cream solid (3.57 g, 74%).  $\nu_{\max}/\text{cm}^{-1}$  3057, 2920 (alkyl chain), 2851 (alkyl chain), 1671 (C=O).

### **Synthesis of 4-(docoxyloxy)salicylaldehyde**

To a solution of 2,4-dihydroxybenzaldehyde (1.86 g, 13.2 mmol) in DMF (20 mL) was added NaHCO<sub>3</sub> (1.11 g, 13.2 mmol). After 10 min stirring at RT, 1-bromodocosane (4.50 g, 11.0 mmol) in DMF–THF (1:4 v/v, 25 mL) was slowly added. The mixture was heated to 120 °C for overnight under Ar. After cooling to RT, aqueous HCl (1 M, 100 mL) was added about 10 mL, and the mixture was stirred vigorously and then filtered. The residue was suspended in acetone (50 mL), filtered, dissolved solid in THF (250 mL), and then left overnight. A brownish precipitate was filtered off. The solution was evaporated and EtOH was added, giving pale-purple powder. The pale-purple powder was dissolved in warm THF (20 mL), cooled in the fridge, and then filtered to give a pale-grey solid (3.26 g, 55%).  $\nu_{\max}/\text{cm}^{-1}$  3055, 2918 (alkyl chain), 2851 (alkyl chain), 1676 (C=O).

### **Synthesis of Hqsal-OC<sub>12</sub>H<sub>25</sub>**

To a solution of 4-(dodecyloxy)salicylaldehyde (1.22 g, 4.0 mmol) in DCM (10 mL) was added 8-aminoquinoline (0.57 g, 4.0 mmol). Then a few drops of trifluoroacetic acid were added to the solution. The solution was stirred overnight under nitrogen, and then evaporated to dryness (yellow solid). This solid was washed with hexane and diethyl-ether to give the title compound as a yellow solid (1.43 g, 83%). HRMS (ESI+)  $m/z$  433.2848 [M+H]<sup>+</sup> (Calcd. for C<sub>28</sub>H<sub>37</sub>N<sub>2</sub>O<sub>2</sub>, 433.2850). 11.48 (1H, s, imine CH), 9.70 (1H, d, J=0.48 Hz, OH), 8.82 (1H, dd, J=6.00, 2.60, Ar<sub>q</sub>-CH), 8.14 (1H, dd, J=8.28, 1.64 Hz, Ar<sub>q</sub>-CH), 7.41 (2H, m, Ar<sub>q</sub>-CH), 7.36 (1H, d, J=7.68 Hz, Ar<sub>q</sub>-CH), 7.18 (1H, dd, J=8.16, 1.16 Hz, Ar<sub>q</sub>-CH), 6.97 (1H, dd, J=7.54, 1.18 Hz, Ar<sub>s</sub>-CH), 6.53 (1H, dd, J=8.68, 2.32 Hz, Ar<sub>s</sub>-CH), 6.41 (1H, d, J=2.32 Hz, Ar<sub>s</sub>-CH), 4.00 (2H, t, J=6.56 Hz, OCH<sub>2</sub>), 1.78 (2H, m, OCH<sub>2</sub>CH<sub>2</sub>), 1.44 (2H, m, OCH<sub>2</sub>CH<sub>2</sub>CH<sub>2</sub>), 1.26 (16H, m, 18 x alkyl-chain CH<sub>2</sub>), 0.88 (3H, t, J=13.84 Hz, CH<sub>2</sub>CH<sub>3</sub>).  $\nu_{\max}/\text{cm}^{-1}$  3061, 2921 (alkyl chain), 2850 (alkyl chain), 1622 (C=N).

### **Synthesis of Hqsal-OC<sub>16</sub>H<sub>33</sub>**

To a solution of 4-(hexyloxy)salicylaldehyde (0.75 g, 2.0 mmol) in DCM (10 mL) was added 8-aminoquinoline (0.29 g, 2.0 mmol). Then a few drops of trifluoroacetic acid were added to the solution. The solution was stirred overnight under nitrogen, and then evaporated to dryness (yellow solid). This solid was washed with hexane and diethyl-ether to give the title compound as a yellow solid (0.87 g, 90%). HRMS (ESI+)  $m/z$  489.3482 [M+H]<sup>+</sup> (Calcd. for C<sub>32</sub>H<sub>45</sub>N<sub>2</sub>O<sub>2</sub>, 489.3476). 11.48 (1H, s, imine CH), 9.70 (1H, d, J=0.44 Hz, OH), 8.78 (1H, dd, J=4.18, 1.70, Ar<sub>q</sub>-CH), 8.10 (1H, dd, J=8.32, 1.68 Hz, Ar<sub>q</sub>-CH), 7.39 (2H, m, Ar<sub>q</sub>-CH), 7.34 (1H, d, J=7.56 Hz, Ar<sub>q</sub>-CH), 7.16 (1H, dd, J=8.14, 1.18 Hz, Ar<sub>q</sub>-CH), 6.95 (1H, dd, J=7.48, 1.24 Hz, Ar<sub>s</sub>-CH), 6.53 (1H, dd, J=8.66, 2.34 Hz, Ar<sub>s</sub>-CH), 6.41 (1H, d, J=2.04 Hz, Ar<sub>s</sub>-CH), 4.00 (2H, t, J=6.58 Hz, OCH<sub>2</sub>), 1.79 (2H, m, OCH<sub>2</sub>CH<sub>2</sub>), 1.45 (2H, m, OCH<sub>2</sub>CH<sub>2</sub>CH<sub>2</sub>), 1.25 (24H, m, 18 x alkyl-chain CH<sub>2</sub>), 0.88 (3H, t, J=13.74 Hz, CH<sub>2</sub>CH<sub>3</sub>).  $\nu_{\max}/\text{cm}^{-1}$  3063, 2921 (alkyl chain), 2850 (alkyl chain), 1618 (C=N).

### **Synthesis of Hqsal-OC<sub>22</sub>H<sub>45</sub>**

To a solution of 4-(docosyloxy)salicylaldehyde (0.89 g, 2.0 mmol) in DCM (10 mL) was added 8-aminoquinoline (0.29 g, 2.0 mmol). Then a few drops of trifluoroacetic acid were added to the solution. The solution was stirred overnight under nitrogen, and then evaporated to dryness (yellow solid). This solid was washed with hexane and diethyl-ether to give the title compound as a yellow solid (1.13 g, 99%). HRMS (ESI+)  $m/z$  573.4413 [M+H]<sup>+</sup> (Calcd. for C<sub>38</sub>H<sub>57</sub>N<sub>2</sub>O<sub>2</sub>, 573.4415).  $\delta$ H(400 MHz; CDCl<sub>3</sub>) 11.48 (1H, s, imine CH), 9.70 (1H, d, J=0.39 Hz, OH), 8.88 (1H, dd, J=4.39, 1.66, Ar<sub>q</sub>-CH), 8.21 (1H, dd, J=8.34, 1.61 Hz, Ar<sub>q</sub>-CH), 7.46 (1H, dd, 8.32, 4.41 Hz, Ar<sub>q</sub>-CH), 7.40 (2H, m, Ar<sub>q</sub>-CH), 7.21 (1H, dd, J=8.15, 1.14 Hz, Ar<sub>q</sub>-CH), 6.99 (1H, dd, J=7.55, 1.18 Hz, Ar<sub>s</sub>-CH), 6.52 (1H, dd, J=8.67, 2.32 Hz, Ar<sub>s</sub>-CH), 6.41 (1H, d, J=2.28 Hz, Ar<sub>s</sub>-CH), 4.00 (2H, t, J=6.57 Hz, OCH<sub>2</sub>), 1.79 (2H, m, OCH<sub>2</sub>CH<sub>2</sub>), 1.44 (2H, m, OCH<sub>2</sub>CH<sub>2</sub>CH<sub>2</sub>), 1.25 (36H, m, 18 x alkyl-chain CH<sub>2</sub>), 0.88 (3H, t, J=13.74 Hz, CH<sub>2</sub>CH<sub>3</sub>).  $\nu_{\max}/\text{cm}^{-1}$  3060, 2917 (alkyl chain), 2849 (alkyl chain), 1626 (C=N).

NMR spectra of Hqsal-OR; R = C<sub>12</sub>H<sub>25</sub>, C<sub>16</sub>H<sub>33</sub> and C<sub>22</sub>H<sub>45</sub>

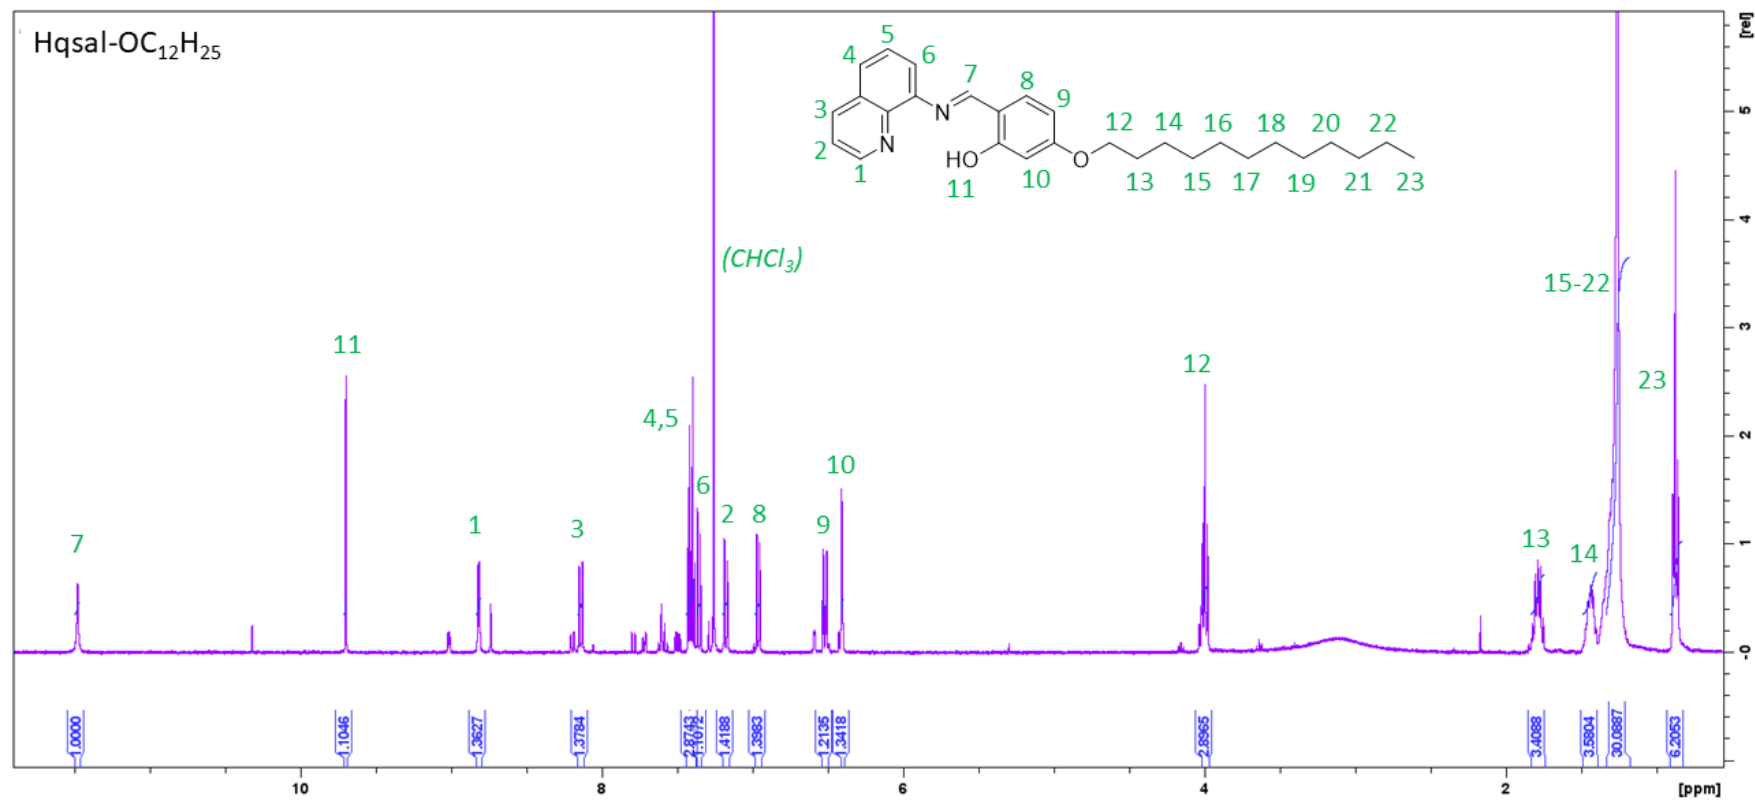

Figure S1 <sup>1</sup>H-NMR (CDCl<sub>3</sub>) of Hqsal-OC<sub>12</sub>H<sub>25</sub>

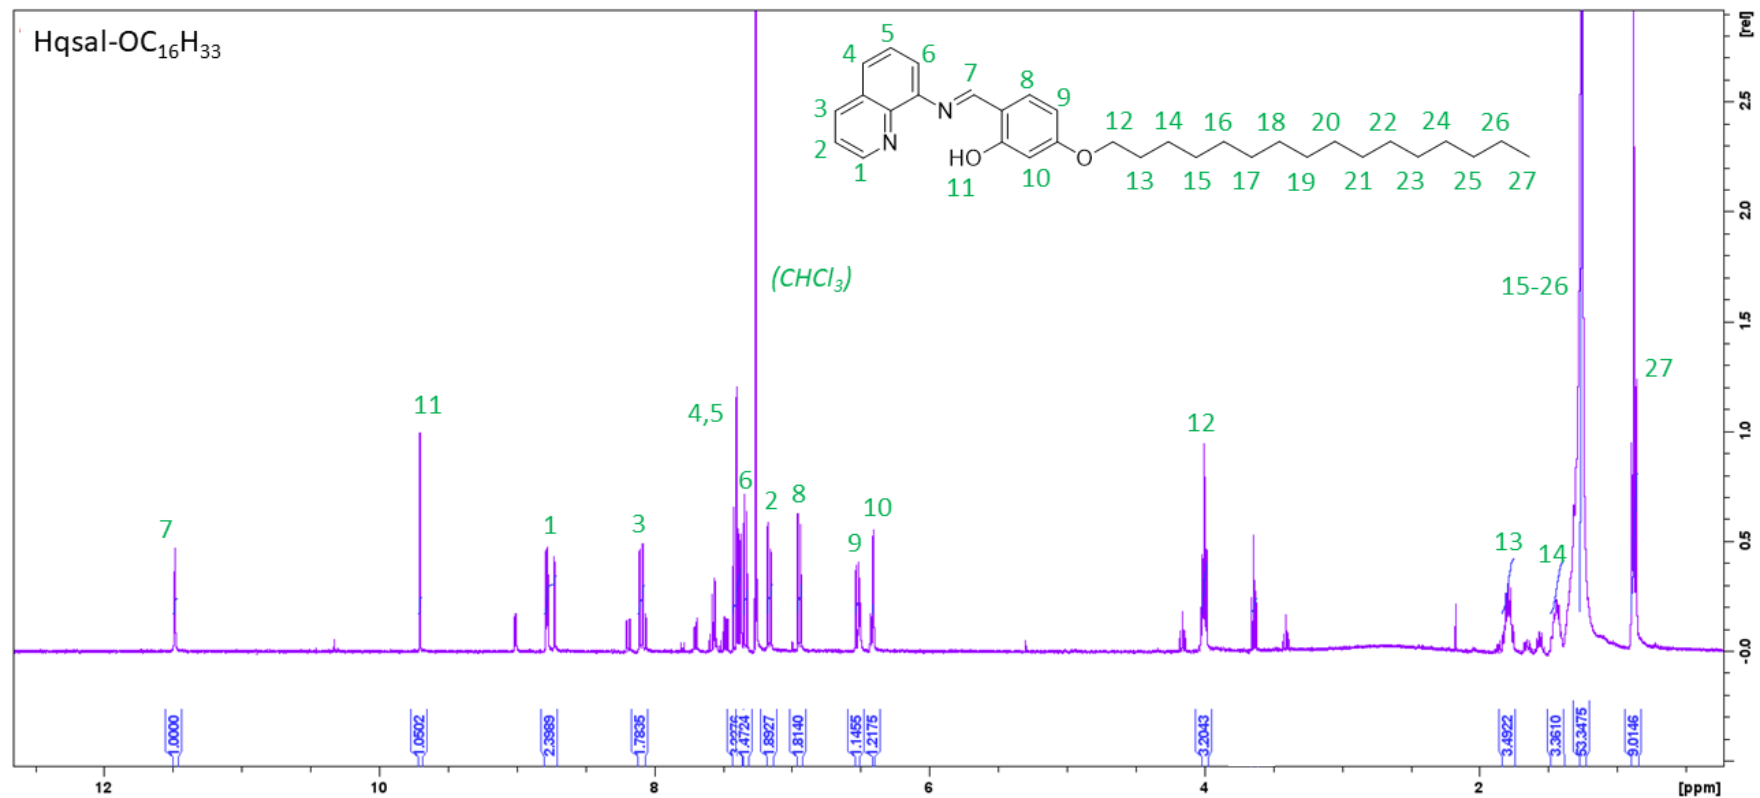

Figure S2 <sup>1</sup>H-NMR (CDCl<sub>3</sub>) of Hqsal-OC<sub>16</sub>H<sub>33</sub>

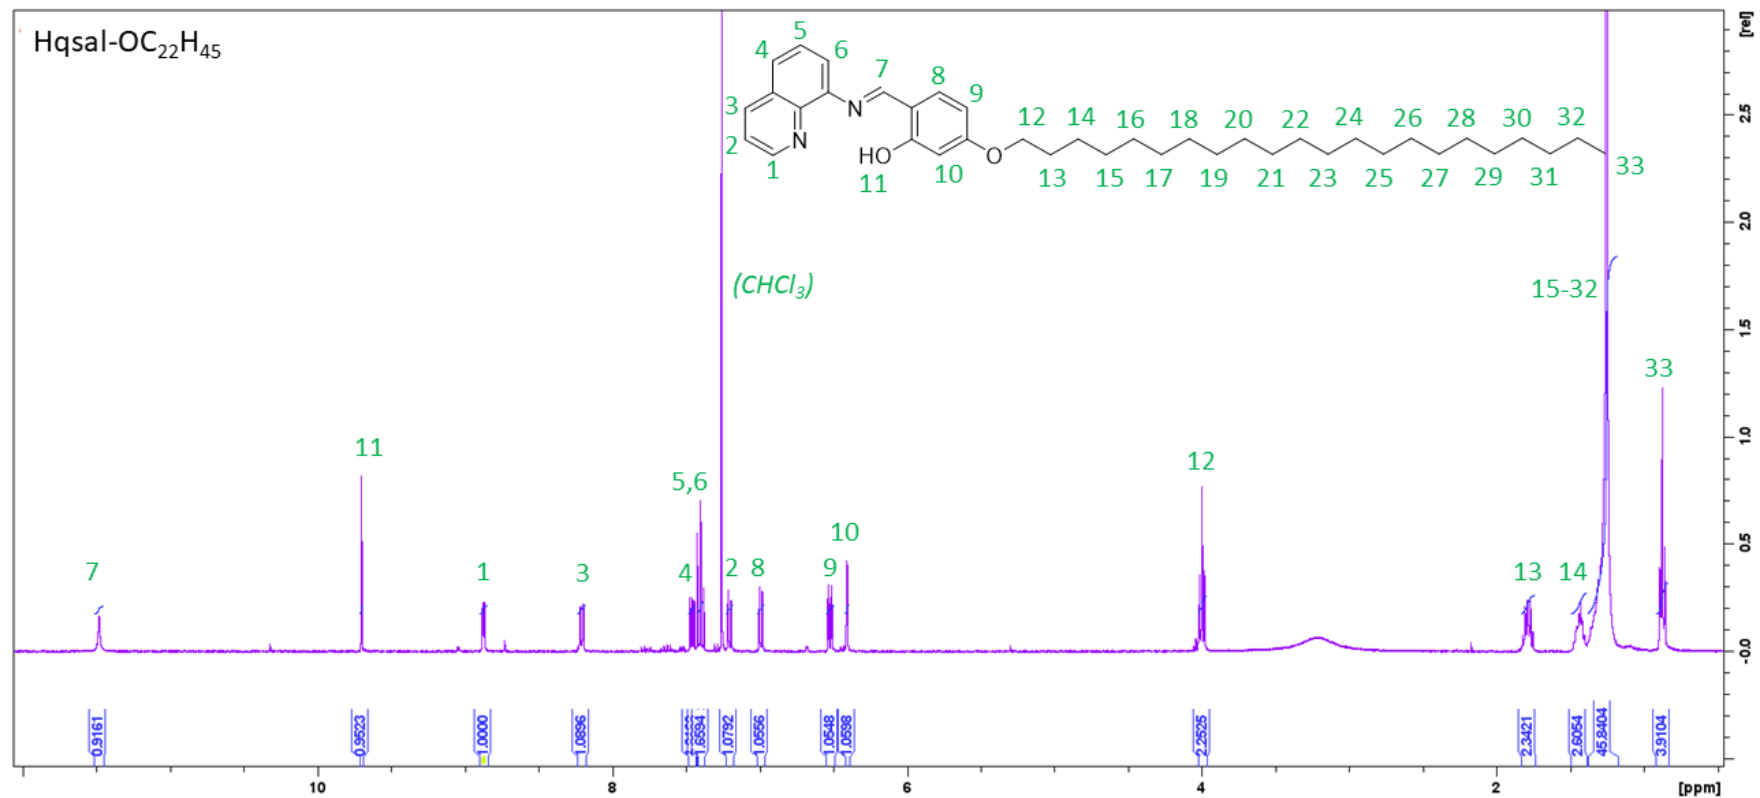

Figure S3 <sup>1</sup>H-NMR (CDCl<sub>3</sub>) of Hqsal-OC<sub>22</sub>H<sub>45</sub>

## FT-IR and UV-Visible absorption spectra of Hqsal-OR

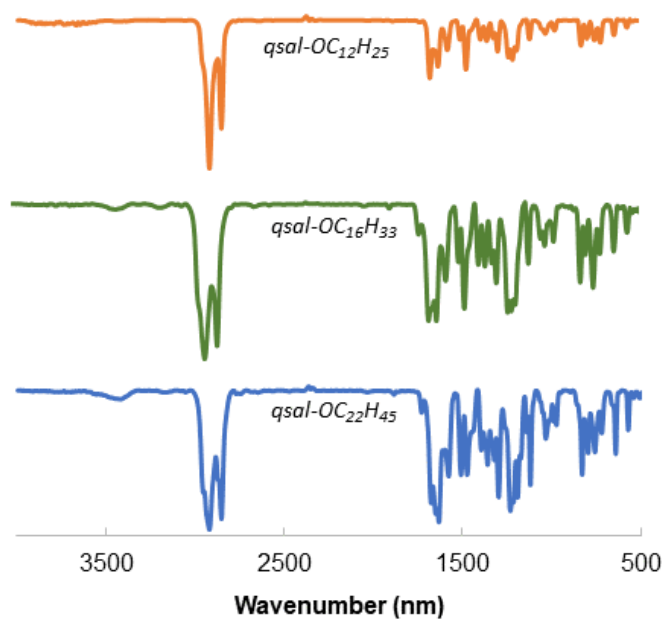

Figure S4 FT-IR spectra of Hqsal-OR ligands.

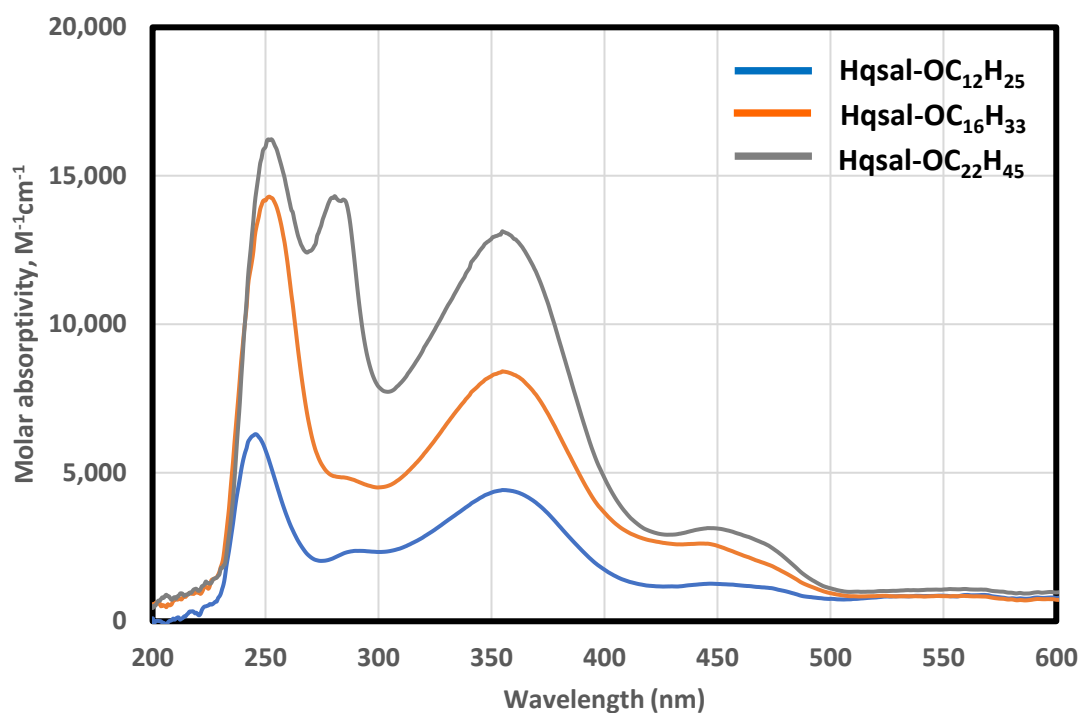

Figure S5 UV-Visible absorption spectra (MeOH, 0.0001 M) of Hqsal-OR ligands.



## Mass spectra of Hqsal-OR and $[\text{Fe}(\text{qsal-OR})_2]\text{NO}_3$ (1-3)

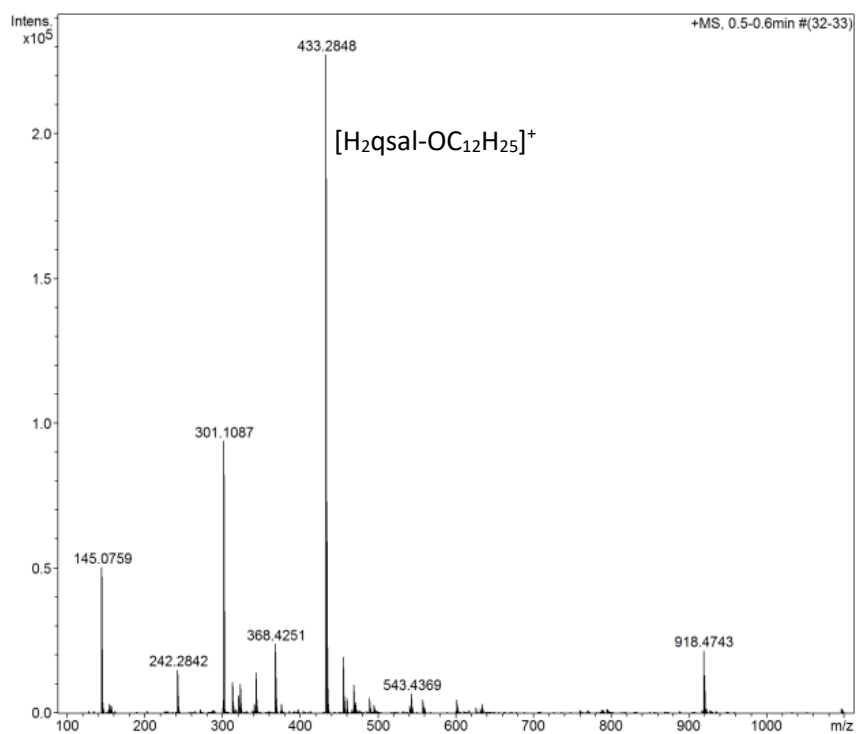

Figure S6 Mass spectrum (ESI+) of Hqsal-OC<sub>12</sub>H<sub>25</sub>

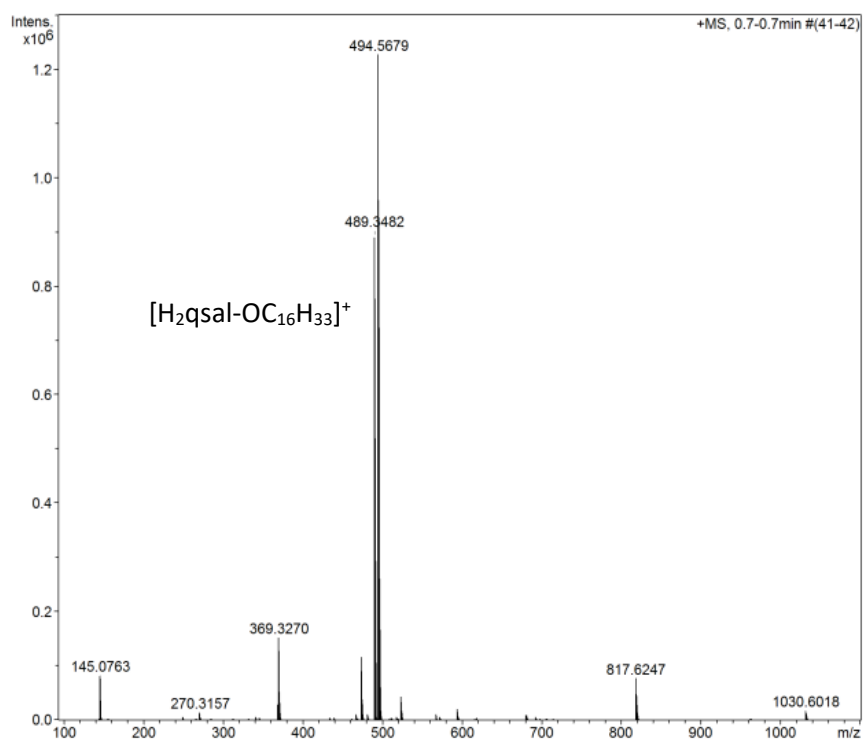

Figure S7 Mass spectrum (ESI+) of Hqsal-OC<sub>16</sub>H<sub>33</sub>

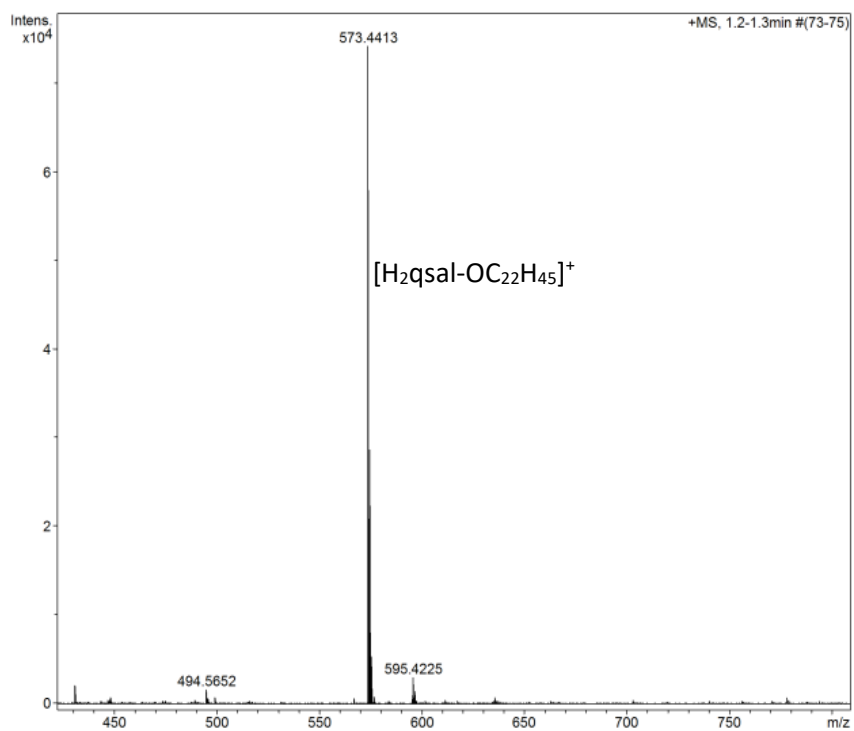

Figure S8 Mass spectrum (ESI+) of Hqsal-OC<sub>22</sub>H<sub>45</sub>

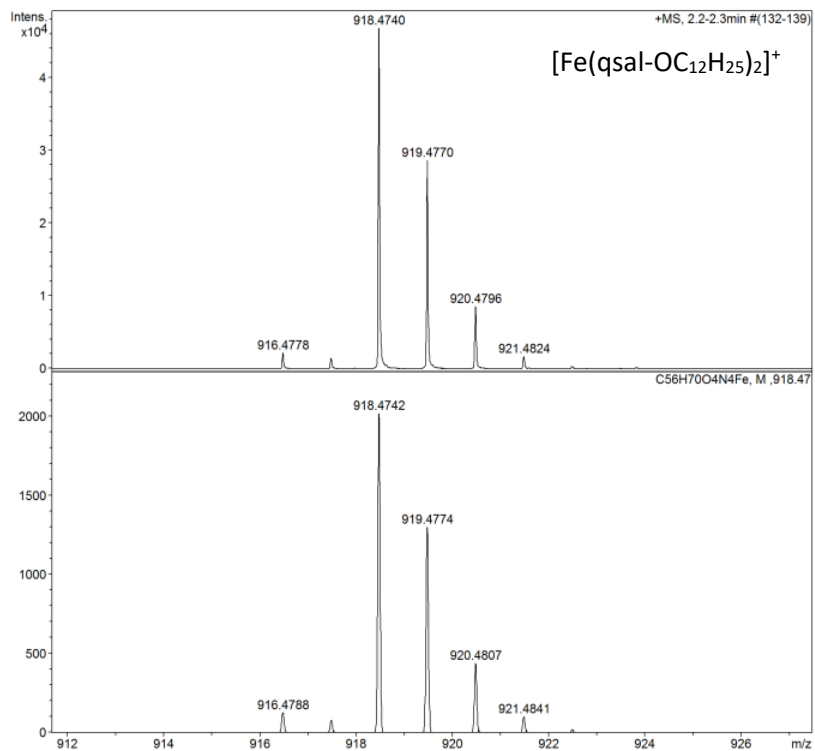

Figure S9 Observed (top) and calculated (bottom) isotope pattern (ESI+) of **1**

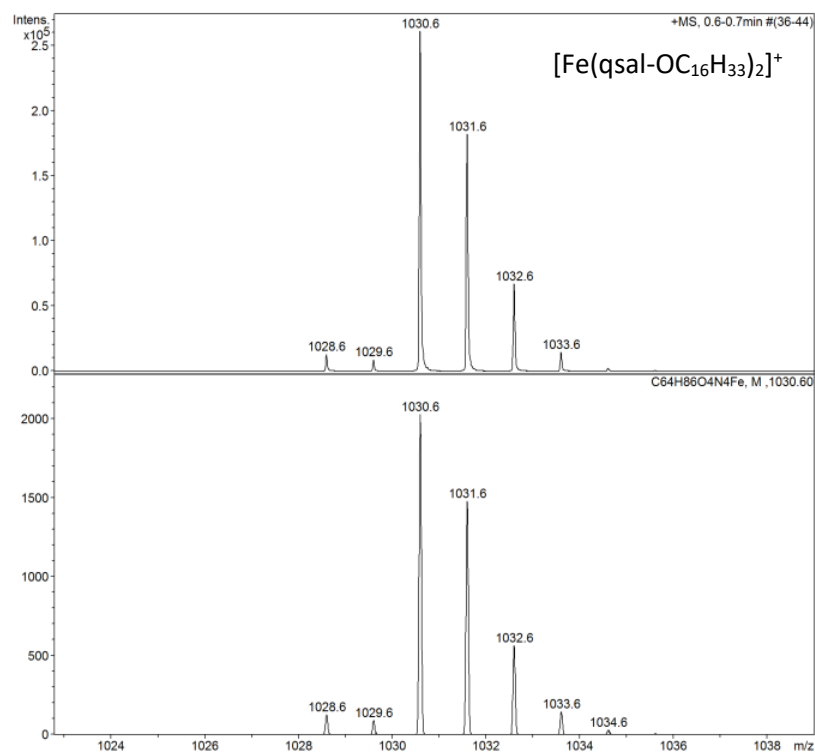

Figure S10 Observed (top) and calculated (bottom) isotope pattern (ESI+) of **2**

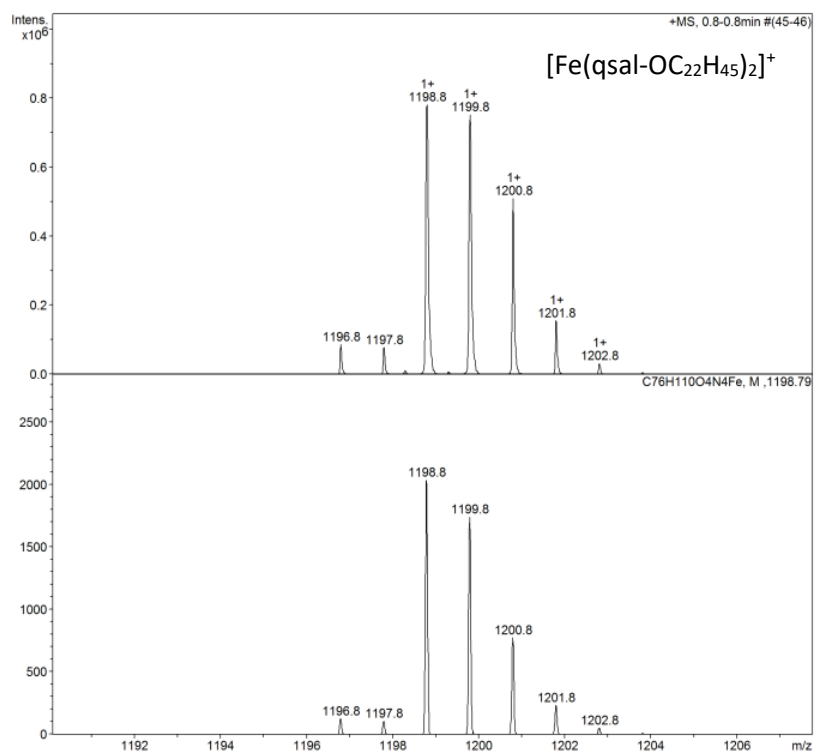

Figure S11 Observed (top) and calculated (bottom) isotope pattern (ESI+) of **3**

FT-IR and UV-Visible absorption spectra of  $[\text{Fe}(\text{qsal-OR})_2]\text{NO}_3$  (1-3)

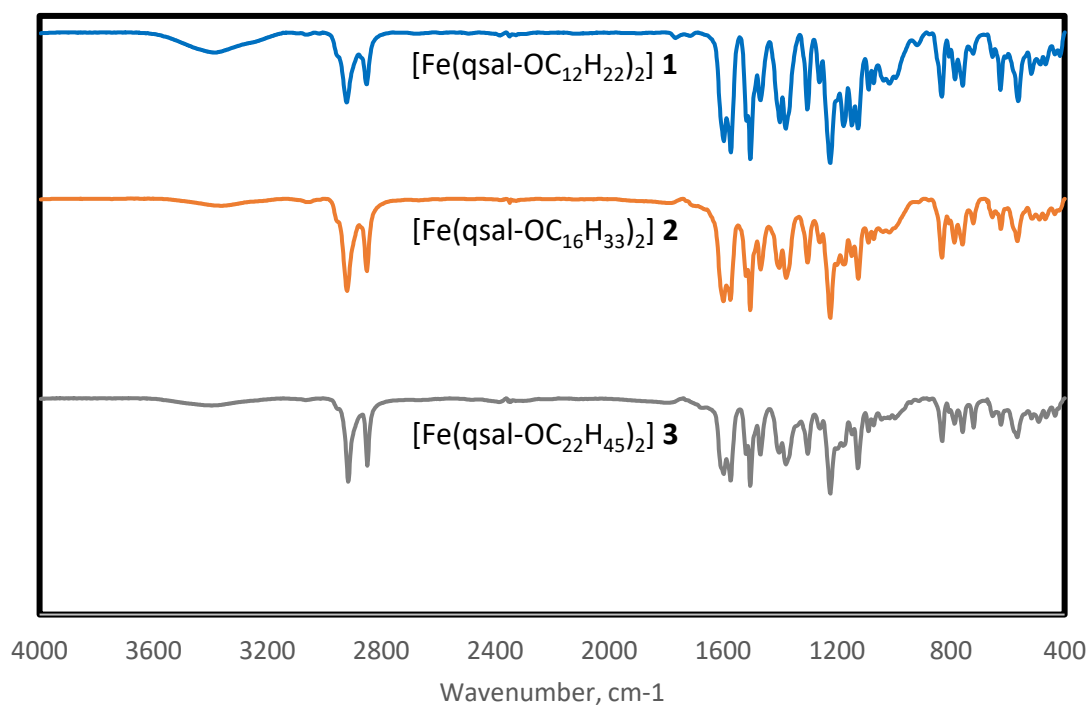

Figure S12 FT-IR spectra of 1-3

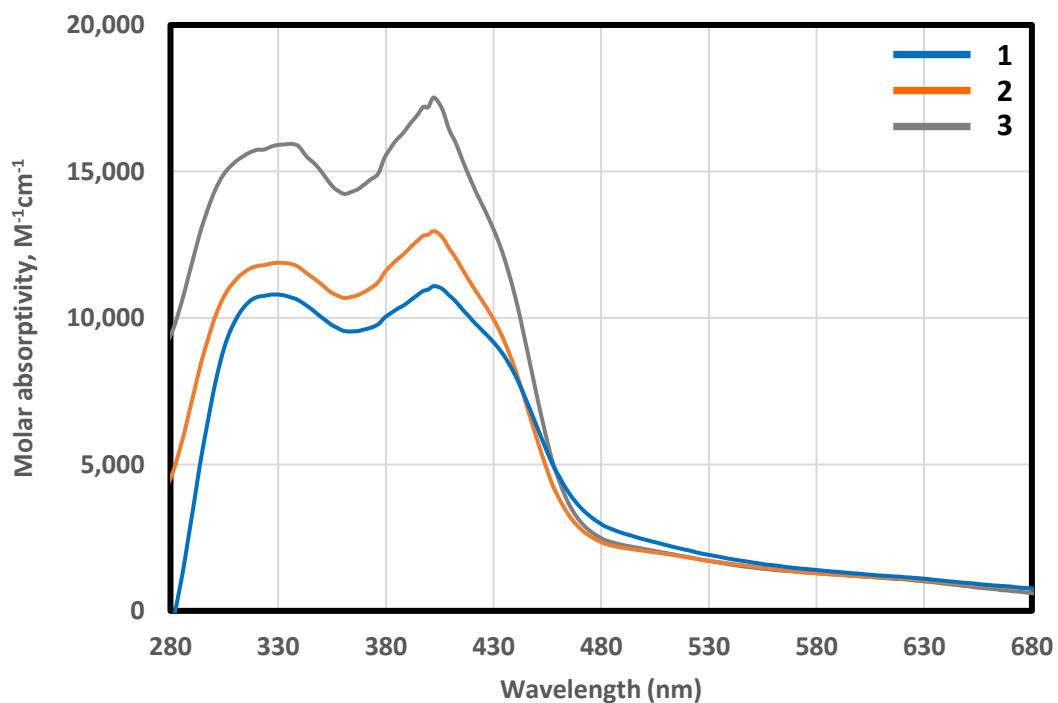

Figure S13 UV-Visible absorption spectra (MeOH, 0.0001 M) of 1-3.

## Crystallographic data for Hqsal-OC<sub>12</sub>H<sub>25</sub> and 1

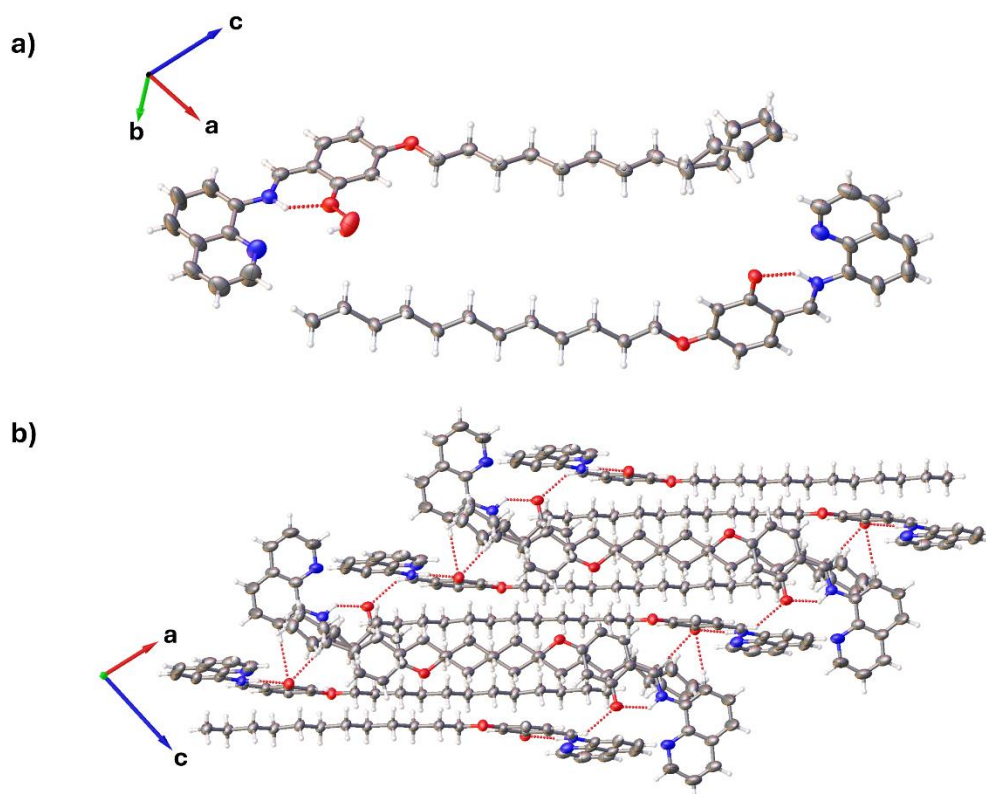

Figure S14 a) Asymmetric unit and b) packing diagram of Hqsal-OC<sub>12</sub>H<sub>25</sub>.

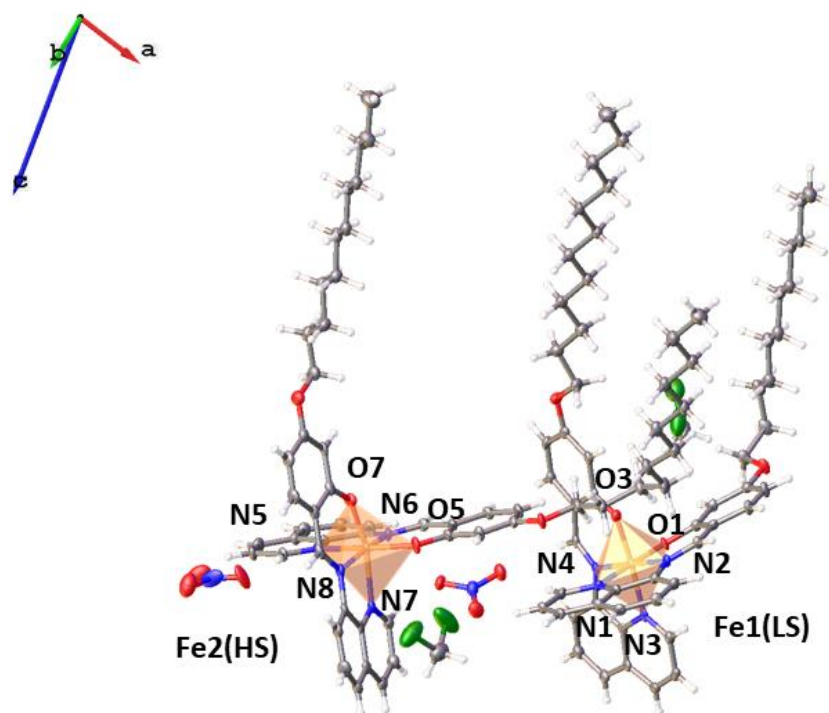

Figure S15 Asymmetric unit of 1.

**Table S1** Crystallographic data and refinement parameters for Hqsal-OC<sub>12</sub>H<sub>25</sub> and **1**

|                                                         | Hqsal-OC <sub>12</sub> H <sub>25</sub>                                                                     | <b>1</b>                                                                                         |
|---------------------------------------------------------|------------------------------------------------------------------------------------------------------------|--------------------------------------------------------------------------------------------------|
| Formula                                                 | C <sub>28</sub> H <sub>36</sub> N <sub>2</sub> O <sub>2</sub> ·2/3CH <sub>3</sub> COOH·1/3H <sub>2</sub> O | C <sub>56</sub> H <sub>70</sub> FeN <sub>5</sub> O <sub>7</sub> ·CH <sub>2</sub> Cl <sub>2</sub> |
| T (K)                                                   | 293(2)                                                                                                     | 293(2)                                                                                           |
| MW (g/mol)                                              | 472.24                                                                                                     | 1065.94                                                                                          |
| Radiation                                               |                                                                                                            | MoK/α                                                                                            |
| λ (Å)                                                   |                                                                                                            | 0.71073                                                                                          |
| Crystal system                                          | Triclinic                                                                                                  | Triclinic                                                                                        |
| Space group                                             | <i>P</i> $\bar{1}$                                                                                         | <i>P</i> $\bar{1}$                                                                               |
| a (Å)                                                   | 10.5229(3)                                                                                                 | 10.1979(3)                                                                                       |
| b (Å)                                                   | 13.1254(3)                                                                                                 | 15.7859(6)                                                                                       |
| c (Å)                                                   | 30.4202(6)                                                                                                 | 35.2696(11)                                                                                      |
| α (°)                                                   | 95.812(2)                                                                                                  | 87.523(3)                                                                                        |
| β (°)                                                   | 97.764(2)                                                                                                  | 83.973(3)                                                                                        |
| γ (°)                                                   | 100.884(2)                                                                                                 | 72.534(3)                                                                                        |
| Cell volume (Å <sup>3</sup> )                           | 4053.30(17)                                                                                                | 5385.7(3)                                                                                        |
| Z                                                       | 18                                                                                                         | 4                                                                                                |
| μ (mm <sup>-1</sup> )                                   | 0.082                                                                                                      | 0.436                                                                                            |
| Reflections collected                                   | 18590                                                                                                      | 18922                                                                                            |
| Independent reflections,<br><i>R</i> <sub>int</sub> (%) | 13617, 3.85                                                                                                | 12359, 7.09                                                                                      |
| <i>R</i> -Factor (%), w <i>R</i> <sub>2</sub> (%)       | 6.19, 15.66                                                                                                | 7.86, 15.83                                                                                      |
| <b>CCDC No.</b>                                         |                                                                                                            |                                                                                                  |

**Table S2** Intermolecular interaction in Hqsal-OC<sub>12</sub>H<sub>25</sub>

| Interaction                                 | Distance (Å) |
|---------------------------------------------|--------------|
| Intramolecular imine in keto form           |              |
| N2-H···O1                                   | 1.515        |
| N4-H···O3                                   | 1.968        |
| N6-H···O5                                   | 2.013        |
| Solvent mediated intermolecular interaction |              |
| O7-H···O1                                   | 1.515        |
| O9-H···O3                                   | 1.426        |
| C1-H···O11                                  | 2.638        |
| C41-H···O5                                  | 2.508        |
| C43-H···O9                                  | 2.647        |
| C35-H···O10                                 | 2.493        |
| C38-H···O10                                 | 2.368        |
| C63-H···O1                                  | 2.636        |
| C66-H···O7                                  | 2.371        |
| C88-H···O8                                  | 2.639        |
| O11-H···O5                                  | 1.602        |
| O11-H···O9                                  | 2.058        |
| π mediated intermolecular interaction       |              |
| π(sal)···π(quin)                            | 3.364, 3.431 |
| C47-H···π(sal)                              | 3.480        |
| C51-H···π(quin)                             | 3.122, 3.227 |

**Table S3** Fe-ligand bond lengths, angles and octahedral distortions parameters in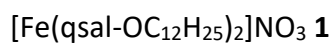

| Parameters                             | Fe1 (LS) | Fe2 (HS)  |
|----------------------------------------|----------|-----------|
| Fe-O <sub>avg</sub> (Å)                | 1.882    | 1.912     |
| Fe-N <sub>imine</sub> (Å)              | 1.931    | 2.114     |
| Fe-N <sub>quin</sub> (Å)               | 1.972    | 2.136     |
| Fe-N <sub>avg</sub> (Å)                | 1.952    | 2.125     |
| Fe-O/N <sub>avg</sub> (Å)              | 1.928    | 2.019     |
| $\Delta\text{Fe-O/N}_{\text{avg}}$ (Å) | -        | 0.091     |
| $\Sigma$ (°)                           | 49.6     | 71.1      |
| $\Theta$ (°)                           | 131      | 250       |
| $\Delta\Sigma, \Delta\Theta$ (°)       | -        | 21.5, 119 |



**Table S4** Intermolecular interaction in [Fe(qsal-OC<sub>12</sub>H<sub>25</sub>)<sub>2</sub>]**1**NO<sub>3</sub>

| Interaction                                                                                   | Distance (Å)   |
|-----------------------------------------------------------------------------------------------|----------------|
| Interaction between 2 Fe center and corresponding nitrate and CH <sub>2</sub> Cl <sub>2</sub> |                |
| $\pi_{\text{quin}} \cdots \pi_{\text{sal}}$                                                   | 4.382          |
| C89-H $\cdots$ $\pi_{\text{quin}}$                                                            | 2.961          |
| C90-H $\cdots$ $\pi_{\text{quin}}$                                                            | 2.951          |
| C68-H $\cdots$ $\pi_{\text{sal}}$                                                             | 3.334          |
| C69-H $\cdots$ O3                                                                             | 3.004          |
| C101-H $\cdots$ O6                                                                            | 2.740          |
| C1-H $\cdots$ O10                                                                             | 2.496          |
| C2-H $\cdots$ O9                                                                              | 2.493          |
| C73-H $\cdots$ O11                                                                            | 2.669          |
| C57-H $\cdots$ O14                                                                            | 2.647          |
| C58-H $\cdots$ O12                                                                            | 2.537          |
| C113-H $\cdots$ O3                                                                            | 3.036          |
| C113-H $\cdots$ $\pi_{\text{sal}}$                                                            | 2.678          |
| C36-H $\cdots$ Cl1                                                                            | 3.144          |
| C45-H $\cdots$ Cl1                                                                            | 3.260          |
| C91-H $\cdots$ Cl2                                                                            | 3.471          |
| O5 $\cdots$ Cl3                                                                               | 3.501          |
| C114-H $\cdots$ O13                                                                           | 2.515          |
| Interaction between Fe center in the 2-D plane with same type of Fe center                    |                |
| C7-H $\cdots$ O4                                                                              | 2.770          |
| C10-H $\cdots$ O4                                                                             | 2.770          |
| $\pi_{\text{quin}} \cdots \pi_{\text{quin}}$                                                  | 3.886          |
| Interaction between 2-D plane mediated by nitrate and CH <sub>2</sub> Cl <sub>2</sub>         |                |
| C74-H $\cdots$ O9                                                                             | 2.572          |
| C18-H $\cdots$ O10                                                                            | 2.612          |
| C59-H $\cdots$ O11                                                                            | 2.557          |
| C73-H $\cdots$ O11                                                                            | 2.669          |
| C74-H $\cdots$ O11                                                                            | 2.618          |
| C75-H $\cdots$ O11                                                                            | 2.538          |
| C21-H $\cdots$ O12                                                                            | 2.576          |
| C114-H $\cdots$ O12                                                                           | 2.515          |
| C23-H $\cdots$ O13                                                                            | 2.497          |
| C26-H $\cdots$ O13                                                                            | 2.441          |
| C26-H $\cdots$ O14                                                                            | 2.756          |
| Interaction between 2 bilayer linked by CH <sub>2</sub> Cl <sub>2</sub>                       |                |
| C100-H $\cdots$ Cl2                                                                           | 3.059          |
| Fe-Fe distances in the 2-D plane                                                              |                |
| Fe1 $\cdots$ Fe1                                                                              | 10.198, 12.877 |
| Fe2 $\cdots$ Fe2                                                                              | 10.198, 10.209 |
| Fe1 $\cdots$ Fe1<br>(across bilayer)                                                          | 25.298         |
| Fe2 $\cdots$ Fe2<br>(across bilayer)                                                          | 28.865         |

### Powder X-Ray diffraction (PXRD) of $[\text{Fe}(\text{qsal-OR})_2]\text{NO}_3$ (1-3)

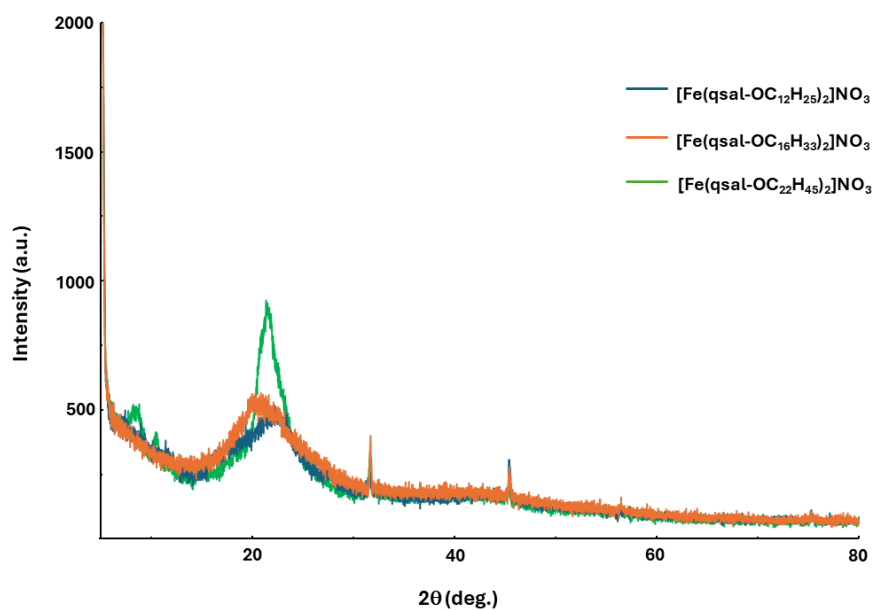

Figure S16 PXRD patterns of 1-3.

### Langmuir data for Hqsal-OR and $[\text{Fe}(\text{qsal-OR})_2]\text{NO}_3$ (1-3)

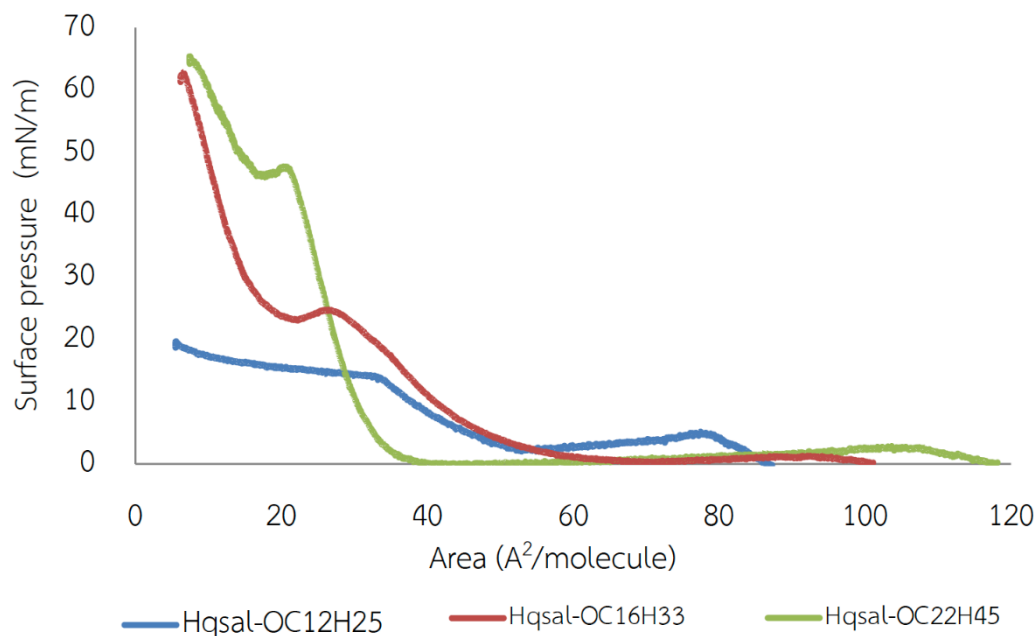

Figure S17 Pressure-area isotherms for ligands Hqsal-OR.

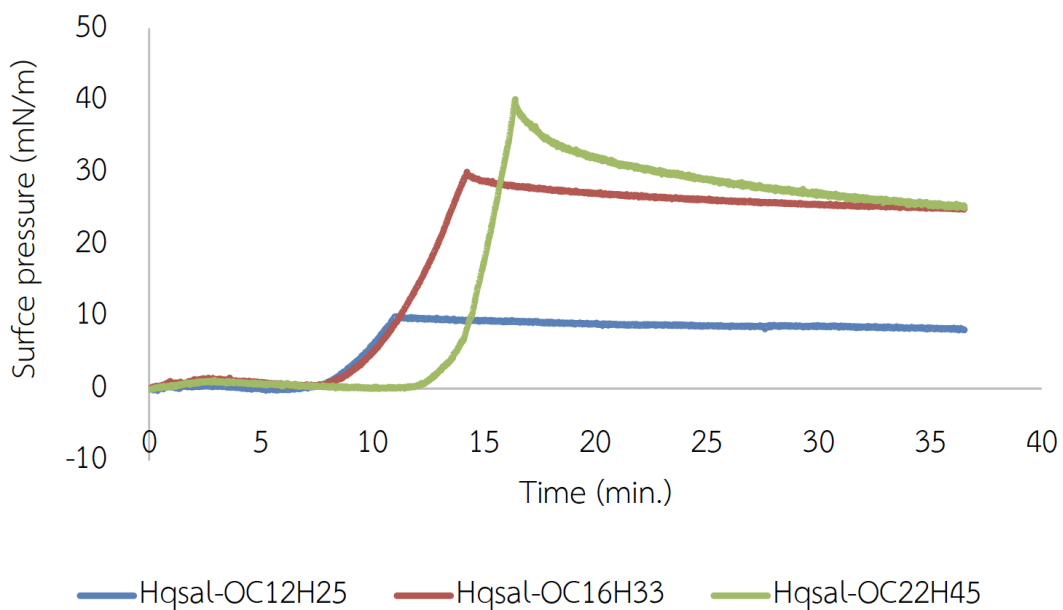

Figure S18 Stability measurements for ligands Hqsal-OR.

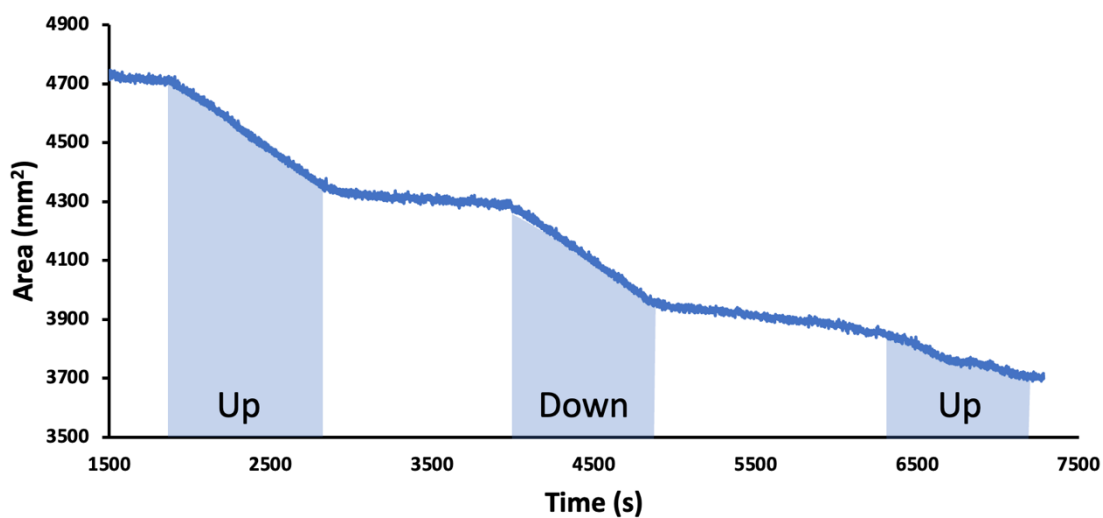

| Compounds                        | Up (1) | Down (2) | Up (3) |
|----------------------------------|--------|----------|--------|
| Compound area (mm <sup>2</sup> ) | 340.37 | 357.8    | 193.35 |
| Substrate area (quartz)          | 340    | 340      | 340    |
| Transfer ratio                   | 1.00   | 1.05     | 0.57   |

Figure S19 Langmuir film transfer for  $[\text{Fe}(\text{qsal-OC}_{12}\text{H}_{33})_2]\text{NO}_3$  (**1**).

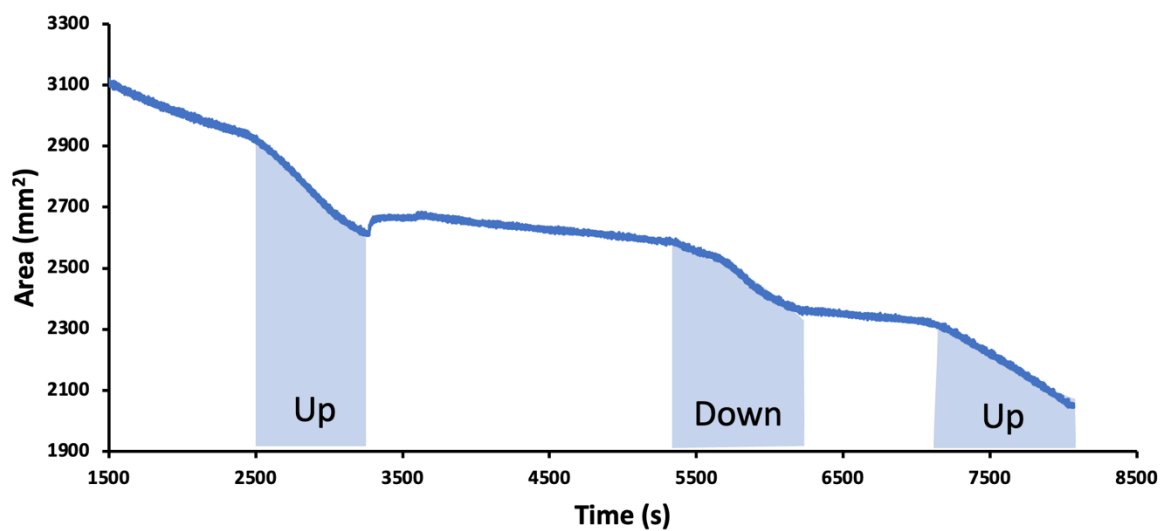

| Compounds                        | Up (1) | Down (2) | Up (3) |
|----------------------------------|--------|----------|--------|
| Compound area (mm <sup>2</sup> ) | 327.61 | 249.62   | 286.06 |
| Substrate area (quartz)          | 340    | 340      | 340    |
| Transfer ratio                   | 0.96   | 0.73     | 0.84   |

Figure S20 Langmuir film transfer for  $[\text{Fe}(\text{qsal-OC}_{22}\text{H}_{33})_2]\text{NO}_3$  (**3**).
